# Supplementary material for: Root-Applied Cerium Oxide Nanoparticles and Their Specific Effects on Plants: A Review
Source: MDPI journal article supplement (doi:10.3390/ijms25074018), 2024-04-04
Supplement: s1 [file s1]

# Root-Applied Cerium Oxide Nanoparticles and Their Specific Effects on Plants: a Review

Monika Pietrzak <sup>1,\*</sup>, Elżbieta Skiba <sup>1,\*</sup> and Wojciech M. Wolf <sup>1</sup>

<sup>1</sup> Institute of General and Ecological Chemistry, Lodz University of Technology, Zeromskiego 114, 90-543 Lodz, Poland; monika.pietrzak@p.lodz.pl (M.P.); elzbieta.skiba@p.lodz.pl (E.S.); wojciech.wolf@p.lodz.pl (W.M.W.)

\* Correspondence: monika.pietrzak@p.lodz.pl ; elzbieta.skiba@p.lodz.pl ; Tel.: +48-42-631-31-23

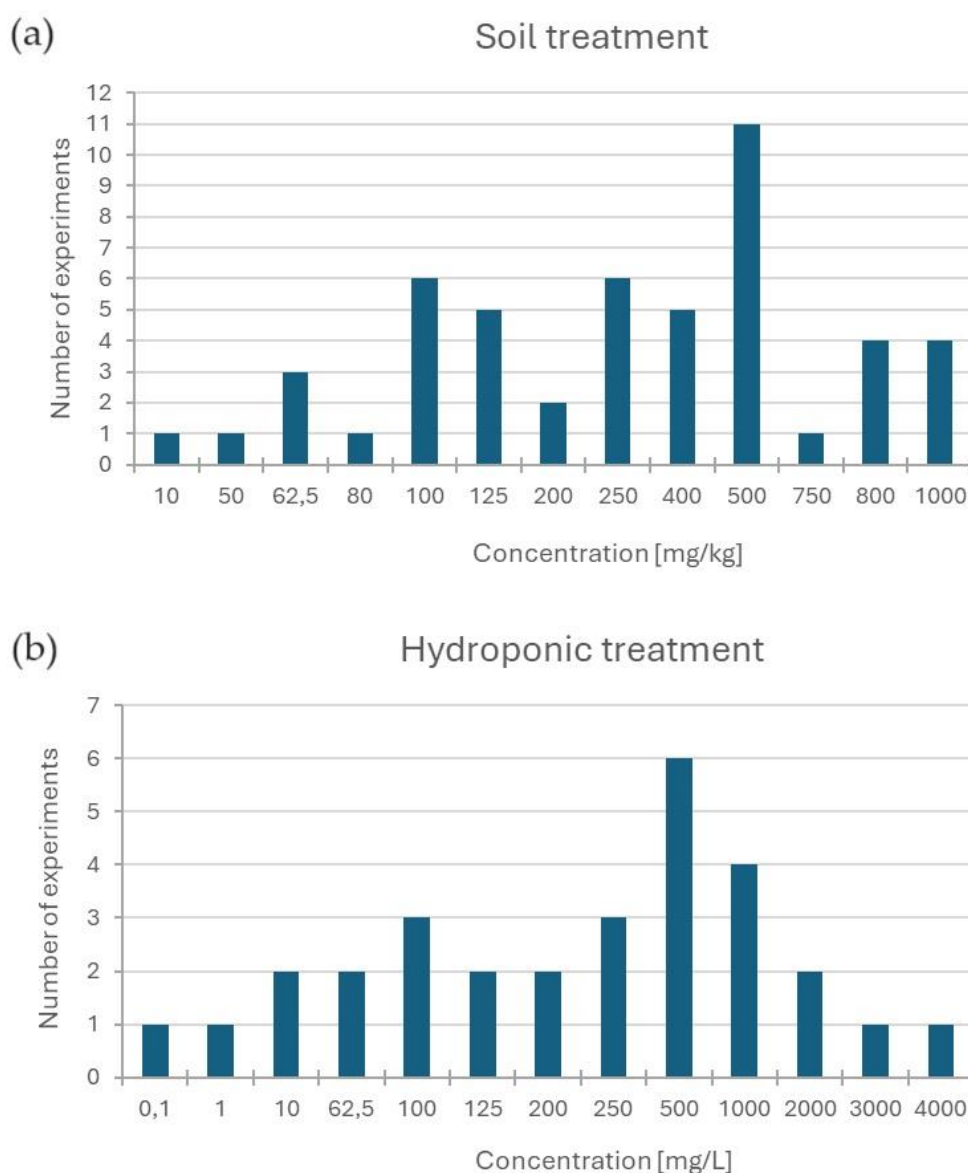

**Figure S1** Distribution of nanoceria levels in soil cultivations (a) and hydroponic media (b) over papers reviewed in this work
